# Supplementary material for: DNAJC10 correlates with tumor immune characteristics and predicts the prognosis of glioma patients
Source: Oxford University Press journal article supplement (doi:10.1042/bsr20212378), 2022-01-01
Supplement: bsr-2021-2378_supp.pdf [file bsr-2021-2378_supp.pdf]

**Supplemental figure 1: Uncropped western blot bands**

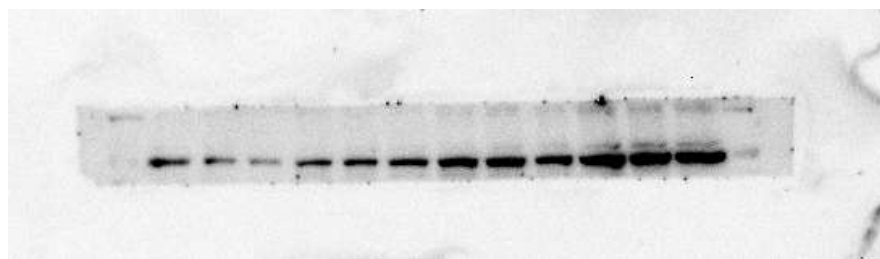

DNAJC10

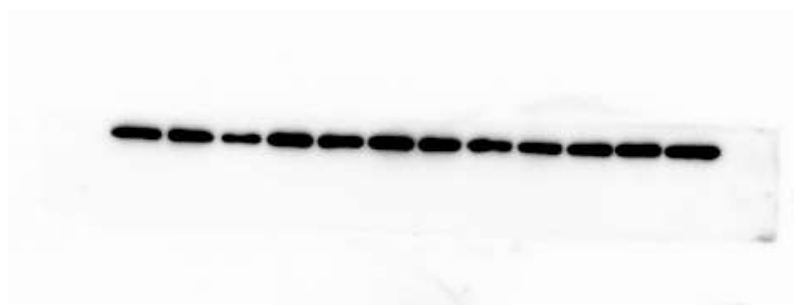

GAPDH
